# Supplementary material for: Gas sensing response analysis of p-type porous chromium oxide thin films
Source: Royal Society of Chemistry journal article supplement (doi:10.1039/c3tc31830c), 2013-01-01
Supplement: c3tc31830c.pdf [file c3tc31830c.pdf]

## Supplementary information

Gas sensing response analysis of p-type mesoporous Chromium Oxide thin films

Vinayak Kamble\*, A. M. Umarji

Address: Materials Research Center,

Indian Institute of Science Bangalore,

India 560012

Email: [vin.kamble01@gmail.com](mailto:vin.kamble01@gmail.com),

## 1. I-V characteristics

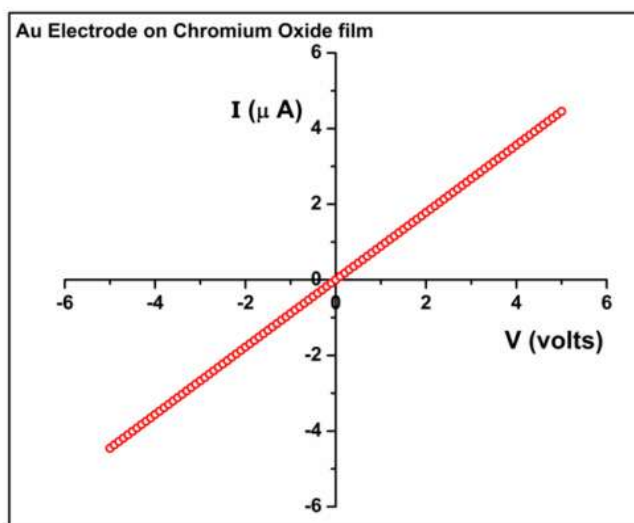

Figure S1. I-V characteristics of Au electrodes on  $\text{Cr}_2\text{O}_3$  films.

## 2. X-ray Diffraction

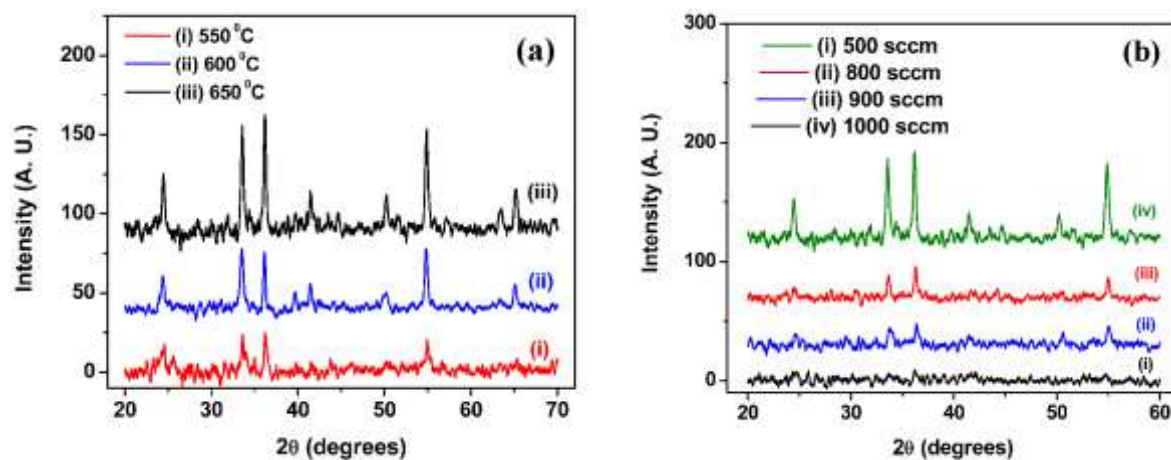

Figure S2. Effect of (a) substrate temperature and (b) carrier flow rate on crystallinity in CM films.

### 3. Raman Spectroscopy

The micro-Raman spectroscopy of the as-deposited  $\text{Cr}_2\text{O}_3$  films is done in order to characterize the crystallinity and to verify the presence/absence of other impurity phases or residual carbonaceous matter.

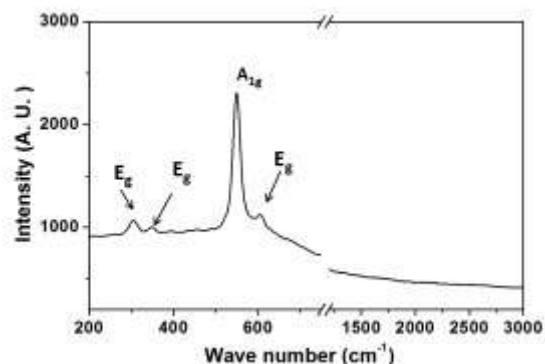

Fig. S3 The micro-Raman spectrum of as-deposited film showing one  $A_{1g}$  and three  $E_g$  modes of rhombohedral  $\text{Cr}_2\text{O}_3$ .

The Raman spectrum is divided into two regions and enlarged. The first region (lower wave numbers) reveals 4 peaks ( $A_{1g}$  +  $3E_g$  modes) which are attributed to corundum structure of  $\text{Cr}_2\text{O}_3$ . No peaks were found pertaining to  $\text{CrO}_2$  or  $\text{CrO}_3$  which marks their absence. Further the 2<sup>nd</sup> region highlights the absence of carbonaceous matter.

Note:

Owing to the diverse nature of experimental setups (static or dynamic) it is difficult to compare the gas sensing properties of chromium oxide sensors developed by various research groups. However, following comparison has been made based on available literature.

Table S1. Comparison between the characteristics of state of the art Cr<sub>2</sub>O<sub>3</sub> based sensors

| Sr. No | Microstructure                                                  | Type of sensing experiment                   | Test gas and concentration | Typical sensitivity value               | Characteristics                                                                  | Reference                                               |
|--------|-----------------------------------------------------------------|----------------------------------------------|----------------------------|-----------------------------------------|----------------------------------------------------------------------------------|---------------------------------------------------------|
| 1.     | Ordered Mesoporous Cr <sub>2</sub> O <sub>3</sub> (Thick films) | Static measurement (Micro syringe injection) | Ethanol<br>1000 ppm        | $R_g/R_a = \sim 13$<br>At<br>T = 150 °C | No selectivity                                                                   | Chem. Commun., 2012, <b>48</b> , 865–867                |
| 2.     | Porous Cr <sub>2</sub> O <sub>3</sub> nanotubes (Thick films)   | Static measurement (Micro syringe injection) | Ethanol<br>800 ppm         | $\Delta R/R_a = \sim 2$                 | High operating temperature >400 °C<br>And slower response at temperature <400 °C | Nanotechnology <b>19</b> (2008) 035504                  |
| 3.     | Cr <sub>2</sub> O <sub>3</sub> thick films                      | Static measurement (Micro syringe injection) | Ethanol<br>700 ppm         | $R_g/R_a = \sim 30$                     | Slower response times (~ 30 s) and recovery time (~150 s)                        | Sensors and Actuators B <b>158</b> (2011) 259–264       |
| 4.     | Reactively sputtered Cr <sub>2</sub> O <sub>3</sub> films       | Dynamic flow based method                    | Ethanol<br>800 ppm         | $R_g/R_a = \sim 2$                      | Slower response and recovery times                                               | Advanced Materials Research <b>55-57</b> (2008) 285-288 |
| 5.     | Porous Cr <sub>2</sub> O <sub>3</sub> thin films (This work)    | Dynamic flow based method                    | Ethanol<br>1000 ppm        | $\Delta R/R_a = \sim 15$                | Fairly good response and selective to ethanol.                                   | This work                                               |
